# Supplementary material for: Our Tangled Family Tree: New Genomic Methods Offer Insight into the Legacy of Archaic Admixture
Source: PubMed Central journal article supplement (PMC8480178; doi:10.1093/gbe/evab115), 2021-05-24
Supplement: evab115_supplementary_data.pdf [file evab115_supplementary_data.pdf]

**Supplementary Table 1. All Genomic Locations and Effects of Archaic Introgression identified after 2013.**

|                                |                                                                                       | Closest putative archaic source pop | Modern populations showing evidence of introgression or association | reference         |
|--------------------------------|---------------------------------------------------------------------------------------|-------------------------------------|---------------------------------------------------------------------|-------------------|
| <b>SNP linked to phenotype</b> |                                                                                       |                                     |                                                                     |                   |
|                                | rs12531711, systemic lupus erthematosus, primary biliary cirrhosis                    | Neanderthal                         |                                                                     | Sankararaman 2014 |
|                                | rs3025343, smoking behavior                                                           | Neanderthal                         |                                                                     | Sankararaman 2014 |
|                                | rs7076156, rs11175593, Crohn's disease                                                | Neanderthal                         |                                                                     | Sankararaman 2014 |
|                                | rs12571093, optic disc size                                                           | Neanderthal                         |                                                                     | Sankararaman 2014 |
|                                | rs1834481, interleukin-18 levels                                                      | Neanderthal                         |                                                                     | Sankararaman 2014 |
|                                | rs75493593, rs75418188, rs117767867, type-2 diabetes                                  | Neanderthal                         |                                                                     | Sankararaman 2014 |
|                                | SELP, rs3917862, hypercoagulable state                                                | Neanderthal                         | European                                                            | Simonti 2016      |
|                                | SLC35F3, rs12049593, protein-calorie malnutrition                                     | Neanderthal                         | European                                                            | Simonti 2016      |
|                                | RHOG, STIM1, rs11030043, symptoms involving urinary system                            | Neanderthal                         | European                                                            | Simonti 2016      |
|                                | SLC6A11, rs901033, tobacco use disorder                                               | Neanderthal                         | European                                                            | Simonti 2016      |
|                                | loci associated with being treated with desloratadine, a drug used to treat allergies |                                     | European, East Asian                                                | Steinrücken 2018  |
|                                | rs11564258, MUC19, Crohn's disease and inflammatory                                   | Neanderthal                         |                                                                     | Rinker            |

|                                                                                                                                                                                                                                         |             |          |               |
|-----------------------------------------------------------------------------------------------------------------------------------------------------------------------------------------------------------------------------------------|-------------|----------|---------------|
| bowel disease                                                                                                                                                                                                                           |             |          | 2019          |
| reduced risk of prostate cancer (rs17632542), decreased concentration of hemoglobin (rs28387074), reduced height (rs3118914), decrease in mean corpuscular haemoglobin (rs72728264) and an increase in plasma prothrombin time (rs6013) | Neanderthal |          | Skov 2020     |
| <b>genes linked to phenotype</b>                                                                                                                                                                                                        |             |          |               |
| EPAS1, hypoxia                                                                                                                                                                                                                          | Denisovan   | Tibetan  | Nielsen 2014  |
| SLC24A4,SPIRE2,TCF25,MC1R,TUBB3,FANCA: hair color (natural before graying)                                                                                                                                                              |             | European | Danneman 2017 |
| RUNX2, skin color                                                                                                                                                                                                                       |             | European | Danneman 2017 |
| BNC2, ease of skin tanning, skin color, incidence of childhood sunburn                                                                                                                                                                  |             | European | Danneman 2017 |
| ZNF536, comparative height size at age 10 years                                                                                                                                                                                         |             | European | Danneman 2017 |
| GJA1, pulse rate                                                                                                                                                                                                                        |             | European | Danneman 2017 |
| ASB1, morning or evening person (chronotype)                                                                                                                                                                                            |             | European | Danneman 2017 |
| CHORDC1, skin color                                                                                                                                                                                                                     |             | European | Danneman 2017 |
| ADAMTSL3, GOLGA6L4, impedance of leg (left and right)                                                                                                                                                                                   |             | European | Danneman 2017 |
| PBLD, sitting height                                                                                                                                                                                                                    |             | European | Danneman 2017 |
| EXOC2, hair color (natural before graying)                                                                                                                                                                                              |             | European | Danneman 2017 |
| EXOC6, daytime dozing or sleeping (narcolepsy)                                                                                                                                                                                          |             | European | Danneman 2017 |
| <b>genes</b>                                                                                                                                                                                                                            |             |          |               |

|  |                                                                                                                                                                                                                                                                                        |             |                                                           |                       |
|--|----------------------------------------------------------------------------------------------------------------------------------------------------------------------------------------------------------------------------------------------------------------------------------------|-------------|-----------------------------------------------------------|-----------------------|
|  | IL18, interleukin-18 levels                                                                                                                                                                                                                                                            | Neanderthal |                                                           | McCoy<br>2017         |
|  | SVEP1, PLXNA2, ST5, RP1-283K11.2, UBE2H, TMEM9B, CTD-2003C8.2, PRSS45, RTN1, TRABD, TMEM9B, RP11-115J16.1, MMAB, AZIN1-AS1, TLR1, MAFB, UBE2H, CYB5A, PAPD7, RGL2, PABPN1L, LINC00693, PLEKHO1, MUC15, HSPG2, DDX60L, RP11-778H2.1, SNHG14, DNNTIP1, AC007389.3, KCNT2, TTBK1, SLC01A2 | Neanderthal |                                                           | McCoy<br>2017         |
|  | TBX15, WARS2                                                                                                                                                                                                                                                                           | Denisovan   | Greenlandic<br>Inuit, East<br>Asians, Native<br>Americans | Racimo<br>2017        |
|  | ANKRD27, MED15, PDGFRB, TGFBR2, IGF1, IGFBP2, IGFBP3, CXCR4, KLF3, PRRX1                                                                                                                                                                                                               |             |                                                           | Silvert<br>2019       |
|  | genes highly expressed in T-cells, including CXCR4,IL7R,IL10RA,NFKBIA,PTPRC                                                                                                                                                                                                            |             |                                                           | Silvert<br>2019       |
|  | regulatory alleles associated with HDHD5 (aka CECR5)                                                                                                                                                                                                                                   | Neanderthal | Europeans                                                 | Rinker<br>2019        |
|  | <b>phenotypes</b>                                                                                                                                                                                                                                                                      |             |                                                           |                       |
|  | phenotypes from electronic health records: actinic keratosis, mood disorders, depression, obesity, seborrheic keratosis, overweight, acute upper respiratory infections, coronary atherosclerosis                                                                                      | Neanderthal | European                                                  | Simonti<br>2016       |
|  | phenotype group: neurologic                                                                                                                                                                                                                                                            | Neanderthal | European                                                  | Simonti<br>2016       |
|  | facial morphology, body mass index, sleep, and metabolite levels in smokers                                                                                                                                                                                                            | Neanderthal |                                                           | Rinker<br>2019        |
|  | <b>GO term/category</b>                                                                                                                                                                                                                                                                |             |                                                           |                       |
|  | keratin filament                                                                                                                                                                                                                                                                       | Neanderthal | European, East<br>Asian                                   | Sankararam<br>an 2014 |
|  | phospholipid transporter activity, trace-amine receptor activity                                                                                                                                                                                                                       | Denisovan   | Oceanian                                                  | Sankararam<br>an 2016 |

|  |                                                                                                                                                                                                |             |                                                   |                   |
|--|------------------------------------------------------------------------------------------------------------------------------------------------------------------------------------------------|-------------|---------------------------------------------------|-------------------|
|  | keratin filament                                                                                                                                                                               | Neanderthal | American, Central/South/East Asian, West Eurasian | Sankararaman 2016 |
|  | cellular response to cadmium ion, cellular response to inorganic substance, cellular response to metal ion, cellular response to zinc ion                                                      | Neanderthal | Central, South, East Asian                        | Sankararaman 2016 |
|  | response to cadmium ion, cadmium ion binding                                                                                                                                                   | Neanderthal | South, East Asian                                 | Sankararaman 2016 |
|  | chemokine-mediated signaling pathway, C-C chemokine receptor activity, chemokine receptor activity, cytokine receptor activity, G-protein coupled chemoattractant receptor activity            | Neanderthal | South Asian                                       | Sankararaman 2016 |
|  | cytokine production involved in inflammatory response, regulation of cytokine production involved in inflammatory response, extracellular region                                               | Neanderthal | West Eurasian                                     | Sankararaman 2016 |
|  | glycosphingolipid metabolic process, intracellular, intracellular membrane-bounded organelle, intracellular organelle, intracellular part, invadopodium, membrane-bounded organelle, organelle | Neanderthal | Oceanian                                          | Sankararaman 2016 |
|  | intermediate filament, intermediate filament cytoskeleton                                                                                                                                      | Neanderthal | American, Central Asian                           | Sankararaman 2016 |
|  | keratin, sensory perception (particularly olfaction)                                                                                                                                           |             |                                                   | Steinrücken 2018  |
|  | regulation of cell motility, insulin-like growth factor binding protein complex (for archaic alleles associated with genes expressed in adipose tissue)                                        |             |                                                   | Silvert 2019      |
